# Supplementary material for: Reprogramming of translation in yeast cells impaired for ribosome recycling favors short, efficiently translated mRNAs
Source: eLife. 2021 Mar 25;10:e64283. doi: 10.7554/eLife.64283 (PMC7993997; doi:10.7554/eLife.64283)
Supplement: Figure 6—figure supplement 2—source data 1. [file elife-64283-fig6-figsupp2-data1.xlsx]

## Sheet: Figure 6—figure supplement 2
Figure 6—figure supplement 2 source data 1
		Relative light units (RLUs) normalized to total protein
WT	Reporter plasmid	Replicate 1	Replicate 2	Replicate 3	Replicate 4	Replicate 5	Replicate 6	Replicate 7	Replicate 8
	70-nt unstructured 5′ UTR	7.15505e+07	4.76884e+07	3.94304e+07	6.53774e+07	5.50646e+07	5.73822e+07	6.54614e+07	5.62934e+07
	cap-proximal(-10.5kcal/mol)	8.3582e+06	1.18881e+07	7.23079e+06	9.14891e+06	8.71248e+06	9.60903e+06	8.6214e+06	8.99954e+06
	cap-proximal(-5.7kcal/mol)	5.02394e+07	6.34652e+07	8.30469e+07	7.40513e+07	8.14216e+07	8.19062e+07	7.48737e+07	5.99409e+07
	cap-distal(-10.5kcal/mol)	6.05846e+06	4.5943e+06	4.25137e+06	4.17359e+06	4.44716e+06	3.23997e+06	3.31478e+06	3.35271e+06
	cap-distal(-5.7kcal/mol)	5.19373e+07	2.93503e+07	3.21769e+07	2.67723e+07	2.65814e+07	2.63337e+07	1.32502e+07	3.7234e+07
tma∆∆	70-nt unstructured 5′ UTR	4.87416e+07	4.3853e+07	3.76293e+07	3.60992e+07	3.45384e+07	3.73129e+07	8.28968e+07	4.04015e+07
	cap-proximal(-10.5kcal/mol)	5.14142e+06	4.98937e+06	4.27154e+06	2.5964e+06	5.21488e+06	5.77066e+06	3.01723e+06	2.35687e+06
	cap-proximal(-5.7kcal/mol)	3.95535e+07	5.8465e+07	6.1934e+07	3.97426e+07	3.55433e+07	6.72234e+07	5.24943e+07	2.78741e+07
	cap-distal(-10.5kcal/mol)	1.82643e+06	3.51625e+06	2.9186e+06	3.59094e+06	2.29524e+06	3.90668e+06	5.48816e+06	2.37791e+06
	cap-distal(-5.7kcal/mol)	2.42121e+07	7.15988e+07	3.17702e+07	3.52739e+07	1.43806e+07	7.2778e+07	2.21833e+07	2.23671e+07
