# Supplementary material for: Reprogramming of translation in yeast cells impaired for ribosome recycling favors short, efficiently translated mRNAs
Source: eLife. 2021 Mar 25;10:e64283. doi: 10.7554/eLife.64283 (PMC7993997; doi:10.7554/eLife.64283)
Supplement: Figure 7—source data 1. [file elife-64283-fig7-data1.xlsx]

## Sheet: Figure 7
Figure 7 source data 1
	nanomoles of o-nitrophenyl-f3-D-galactopyranoside [ONPG] cleaved per minute per milligram of total protein
	WT		tma20∆		tma22∆		tma64∆		tma64∆/tma20∆		tma64∆/tma22∆
	-SM	+SM	-SM	+SM	-SM	+SM	-SM	+SM	-SM	+SM	-SM	+SM
Replicate 1	13	226	14	298	13	265	12	205	15	327	7	152
Replicate 2	14	266	20	380	13	231	10	235	8	148	14	318
Replicate 3	13	229	11	290	13	238	9	212	14	328	15	320
Replicate 4	15	229	13	313	14	280	13	212	16	498	7	206
Replicate 5	14	305	19	447	13	249	11	248	9	193	14	368
Replicate 6	12	256	10	293	16	292	10	198	14	350	14	364
